# Supplementary material for: Warfarin Anticoagulation Therapy in Caribbean Hispanics of Puerto Rico: A Candidate Gene Association Study
Source: PubMed Central journal article supplement (PMC5461284; doi:10.3389/fphar.2017.00347), 2017-06-07

*Supplementary material*

**Warfarin anticoagulation therapy in Caribbean Hispanics of Puerto Rico: a candidate genes association**

Karla Claudio<sup>1\*</sup>, Aurora Labastida<sup>2</sup>, Alga Ramos<sup>3</sup>, Andrea Gaedigk<sup>4</sup>, Jessica Renta<sup>5</sup>, Dariana Padilla<sup>6</sup>, Giselle Rivera-Miranda<sup>7</sup>, Stuart A. Scott<sup>8,9</sup>, Gualberto Rúaño<sup>10</sup>, Carmen L. Cadilla<sup>5</sup> and Jorge Duconge<sup>11</sup>

\*Correspondence to [karla.claudio2@upr.edu](mailto:karla.claudio2@upr.edu)

Department of Pharmacology and Toxicology, School of Medicine, 3<sup>rd</sup> floor, main building, Medical Sciences Campus, University of Puerto Rico, PO Box 365067, San Juan, PR 00936-5067.

**Supplementary Tables****Table S1.** Ancestral proportions of each parental population used for the ancestry analysis and Puerto Ricans in our study and in the 1000 Genomes Project.

| <b>Population</b>                                         | <b>n</b> | <b>African (%)</b> | <b>European (%)</b> | <b>Native American (%)</b> |
|-----------------------------------------------------------|----------|--------------------|---------------------|----------------------------|
| <b>Puerto Ricans from VACHS on warfarin</b>               | 95       | 16.3               | 58.2                | 25.5                       |
| <b>Puerto Ricans from 1000 Genomes Project</b>            | 104      | 16.9               | 68.3                | 14.8                       |
| <b>Natives (Zapotecas)</b>                                | 45       | 00.3               | 00.9                | 98.8                       |
| <b>Africans</b>                                           | 208      | 99.6               | 00.2                | 00.2                       |
| <b>Europeans</b>                                          | 59       | 00.2               | 99.5                | 00.4                       |
| <b>Stratification based on warfarin dose requirements</b> |          |                    |                     |                            |
| <b>Sensitive (&lt;4 mg/day)</b>                           | 41       | 14.2               | 61.0                | 24.7                       |
| <b>Control (4-6 mg/day)</b>                               | 32       | 17.1               | 56.9                | 26.0                       |
| <b>Resistant (&gt;6 mg/day)</b>                           | 22       | 19.1               | 55.5                | 25.5                       |

**Table S2.** Nomenclature of SNVs frequently used through the text.

| Chr | Variant ID  | Common name             | Gene          | Position (hg 19) |
|-----|-------------|-------------------------|---------------|------------------|
| 1   | rs2020870   |                         | <i>FMO2</i>   | 171154959        |
| 10  | rs114071557 | <i>CYP2C9*36</i>        | <i>CYP2C9</i> | 96698440         |
| 10  | rs142240658 | <i>CYP2C9*21</i>        | <i>CYP2C9</i> | 96698528         |
| 10  | rs1799853   | <i>CYP2C9*2</i>         | <i>CYP2C9</i> | 96702047         |
| 10  | rs7900194   | <i>CYP2C9*8</i>         | <i>CYP2C9</i> | 96702066         |
| 10  | rs2860905   |                         | <i>CYP2C9</i> | 96702295         |
| 10  | rs2256871   | <i>CYP2C9*9</i>         | <i>CYP2C9</i> | 96708974         |
| 10  | rs1856908   |                         | <i>CYP2C9</i> | 96732731         |
| 10  | rs28371685  | <i>CYP2C9*11</i>        | <i>CYP2C9</i> | 96740981         |
| 10  | rs1057910   | <i>CYP2C9*3</i>         | <i>CYP2C9</i> | 96741053         |
| 10  | rs28371686  | <i>CYP2C9*5</i>         | <i>CYP2C9</i> | 96741058         |
| 10  | rs9332339   | <i>CYP2C9*12</i>        | <i>CYP2C9</i> | 96748777         |
| 16  | rs9923231   | <i>VKORC1</i> -1639 G>A | <i>VKORC1</i> | 31107689         |
| 16  | rs4783745   |                         | <i>CES2</i>   | 66970975         |
| 19  | rs2108622   | <i>CYP4F2*3</i>         | <i>CYP4F2</i> | 15990431         |
| 19  | rs3093106   |                         | <i>CYP4F2</i> | 16008257         |

**Table S3.** SNVs associated with warfarin sensitivity (<4 mg/day). Variants are displayed in increasing order of P-values and by gene locus.

| Chr | SNV ID                     | Position  | Gene          | Location   | MA | Empirical P-value       | OR    | CI (95%)     | Freq. Sensitive | Freq. Non-Sensitive     | Method |
|-----|----------------------------|-----------|---------------|------------|----|-------------------------|-------|--------------|-----------------|-------------------------|--------|
| 16  | <b>VKORC1 -1639 G&gt;A</b> | 31107689  | <i>VKORC1</i> | Upstream   | A  | 1.00 x 10 <sup>-6</sup> | 5.94  | 3.17 - 11.13 | 0.60            | 0.20                    | DMET   |
| 16  | rs9934438                  | 31104878  | <i>VKORC1</i> | Intron     | T  | 1.00 x 10 <sup>-6</sup> | 5.51  | 2.94 - 10.32 | 0.57            | 0.19                    | DMET   |
| 16  | rs2359612                  | 31103796  | <i>VKORC1</i> | Upstream   | T  | 1.00 x 10 <sup>-6</sup> | 5.15  | 2.80 - 9.48  | 0.60            | 0.23                    | DMET   |
| 16  | rs8050894                  | 31104509  | <i>VKORC1</i> | Intron     | C  | 2.00 x 10 <sup>-6</sup> | 4.18  | 2.31 - 7.57  | 0.59            | 0.26                    | DMET   |
| 10  | <b>rs2860905</b>           | 96702295  | <i>CYP2C9</i> | Intron     | A  | 1.00 x 10 <sup>-6</sup> | 7.07  | 3.33 - 15.03 | 0.40            | 0.08                    | NGS    |
| 10  | rs1934963                  | 96734676  | <i>CYP2C9</i> | Intron     | C  | 2.00 x 10 <sup>-6</sup> | 7.36  | 3.16 - 17.15 | 0.32            | 0.06                    | NGS    |
| 10  | rs4917639                  | 96725535  | <i>CYP2C9</i> | Intron     | C  | 4.00 x 10 <sup>-6</sup> | 7.61  | 3.13 - 18.54 | 0.30            | 0.05                    | NGS    |
| 10  | rs9332220                  | 96743943  | <i>CYP2C9</i> | Intron     | A  | 4.00 x 10 <sup>-6</sup> | 6.49  | 2.88 - 14.64 | 0.32            | 0.07                    | NGS    |
| 10  | rs4918797                  | 96750251  | <i>CYP2C9</i> | Downstream | T  | 6.00 x 10 <sup>-6</sup> | 6.15  | 2.72 - 13.91 | 0.31            | 0.07                    | NGS    |
| 10  | rs61886788                 | 96694843  | <i>CYP2C9</i> | Upstream   | G  | 7.00 x 10 <sup>-6</sup> | 5.79  | 2.64 - 12.73 | 0.33            | 0.08                    | NGS    |
| 10  | rs61886769                 | 96695080  | <i>CYP2C9</i> | Upstream   | C  | 7.00 x 10 <sup>-6</sup> | 6.15  | 2.72 - 13.91 | 0.31            | 0.07                    | NGS    |
| 10  | rs4086116                  | 96707202  | <i>CYP2C9</i> | Intron     | T  | 7.00 x 10 <sup>-6</sup> | 6.15  | 2.72 - 13.91 | 0.31            | 0.07                    | NGS    |
| 10  | rs28371677                 | 96702472  | <i>CYP2C9</i> | Intron     | G  | 1.50 x 10 <sup>-5</sup> | 5.22  | 2.43 - 11.22 | 0.32            | 0.08                    | NGS    |
| 10  | rs9332172                  | 96731788  | <i>CYP2C9</i> | Intron     | G  | 1.50 x 10 <sup>-5</sup> | 5.22  | 2.43 - 11.22 | 0.33            | 0.08                    | NGS    |
| 10  | <b>CYP2C9*2</b>            | 96702047  | <i>CYP2C9</i> | Exon       | T  | 8.68 x 10 <sup>-4</sup> | 5.71  | 2.00 - 16.26 | 0.19            | 0.04                    | NGS    |
| 16  | rs2884737                  | 31105554  | <i>VKORC1</i> | Intron     | G  | 4.53 x 10 <sup>-4</sup> | 2.96  | 1.48 - 5.97  | 0.31            | 0.13                    | DMET   |
| 16  | rs7294                     | 31102321  | <i>VKORC1</i> | 3'-UTR     | A  | 1.45 x 10 <sup>-3</sup> | 0.370 | 0.20 - 0.69  | 0.22            | 0.43                    | DMET   |
| 16  | rs11150606                 | 31099011  | <i>PRSS53</i> | Exon       | G  | 1.98 x 10 <sup>-3</sup> | 5.792 | 1.56 - 21.5  | 0.14            | 0.03                    | DMET   |
| 10  | rs1057911                  | 96748737  | <i>CYP2C9</i> | Exon       | T  | 2.29 x 10 <sup>-3</sup> | 6.324 | 1.73 - 23.16 | 0.14            | 0.02                    | DMET   |
| 19  | rs57266494                 | 41703793  | <i>CYP2S1</i> | Exon       | A  | 3.64 x 10 <sup>-3</sup> | 12.00 | 1.47 - 97.95 | 0.10            | 8.93 x 10 <sup>-3</sup> | DMET   |
| 13  | rs1801246                  | 52520507  | <i>ATP7B</i>  | Exon       | A  | 6.19 x 10 <sup>-3</sup> | NA    | NA           | 0.06            | 0                       | DMET   |
| 6   | rs4715354                  | 52708797  | <i>GSTA5</i>  | Intron     | T  | 8.28 x 10 <sup>-3</sup> | 2.22  | 1.03 - 3.60  | 0.55            | 0.35                    | DMET   |
| 10  | <b>CYP2C9*3</b>            | 96741053  | <i>CYP2C9</i> | Exon       | C  | 9.37 x 10 <sup>-3</sup> | 5.57  | 1.49 - 20.88 | 0.12            | 0.02                    | NGS    |
| 1   | rs2020870                  | 171154959 | <i>FMO2</i>   | Exon       | G  | 9.44 x 10 <sup>-3</sup> | 0.087 | 0.01 - 0.68  | 0.01            | 0.12                    | DMET   |

**Table S4.** SNVs associated with warfarin resistance (>6 mg/day). Variants are displayed in increasing order of P-values and by gene locus.

| Chr | SNV ID                  | Position | Gene           | Location   | MA | Empirical P-value       | OR   | CI (95%)    | Freq. Resistant | Freq. Non-Resistant | Method |
|-----|-------------------------|----------|----------------|------------|----|-------------------------|------|-------------|-----------------|---------------------|--------|
| 16  | <i>VKORC1</i> -1639 G>A | 31107689 | <i>VKORC1</i>  | Upstream   | A  | 6.62 x 10 <sup>-4</sup> | 0.27 | 0.13 - 0.57 | 0.17            | 0.44                | DMET   |
| 16  | rs2359612               | 31103796 | <i>VKORC1</i>  | Upstream   | T  | 2.23 x 10 <sup>-4</sup> | 0.25 | 0.11 - 0.53 | 0.18            | 0.46                | DMET   |
| 16  | rs9934438               | 31104878 | <i>VKORC1</i>  | Intron     | T  | 1.34 x 10 <sup>-3</sup> | 0.28 | 0.13 - 0.60 | 0.17            | 0.42                | DMET   |
| 10  | <b>rs2860905</b>        | 96702295 | <i>CYP2C9</i>  | Intron     | A  | 8.83 x 10 <sup>-4</sup> | 0.12 | 0.04 - 0.50 | 0.04            | 0.23                | NGS    |
| 10  | rs28371677              | 96702472 | <i>CYP2C9</i>  | Intron     | G  | 1.02 x 10 <sup>-3</sup> | 0.12 | 0.02 - 0.50 | 0.04            | 0.23                | NGS    |
| 10  | rs9332172               | 96731788 | <i>CYP2C9</i>  | Intron     | G  | 1.08 x 10 <sup>-3</sup> | 0.12 | 0.02 - 0.50 | 0.04            | 0.23                | NGS    |
| 10  | rs9332220               | 96743943 | <i>CYP2C9</i>  | Intron     | A  | 2.18 x 10 <sup>-3</sup> | 0.13 | 0.03 - 0.54 | 0.04            | 0.22                | NGS    |
| 10  | rs61886788              | 96694843 | <i>CYP2C9</i>  | Upstream   | G  | 2.33 x 10 <sup>-3</sup> | 0.12 | 0.02 - 0.52 | 0.04            | 0.23                | NGS    |
| 10  | rs4918797               | 96750251 | <i>CYP2C9</i>  | Downstream | T  | 3.21 x 10 <sup>-3</sup> | 0.13 | 0.03 - 0.56 | 0.04            | 0.22                | NGS    |
| 10  | rs4086116               | 96707202 | <i>CYP2C9</i>  | Intron     | T  | 3.21 x 10 <sup>-3</sup> | 0.13 | 0.03 - 0.56 | 0.04            | 0.22                | NGS    |
| 10  | rs61886769              | 96695080 | <i>CYP2C9</i>  | Upstream   | C  | 3.21 x 10 <sup>-3</sup> | 0.13 | 0.03 - 0.56 | 0.04            | 0.22                | NGS    |
| 10  | rs1934963               | 96734676 | <i>CYP2C9</i>  | Intron     | C  | 3.22 x 10 <sup>-3</sup> | 0.13 | 0.03 - 0.56 | 0.04            | 0.22                | NGS    |
| 10  | rs4917639               | 96725535 | <i>CYP2C9</i>  | Intron     | C  | 3.41 x 10 <sup>-3</sup> | 0.14 | 0.03 - 0.63 | 0.04            | 0.19                | NGS    |
| 10  | <b>rs1856908</b>        | 96732731 | <i>CYP2C9</i>  | Intron     | T  | 3.65 x 10 <sup>-3</sup> | 2.53 | 1.36 - 4.64 | 0.55            | 0.33                | NGS    |
| 10  | rs1934965               | 96737935 | <i>CYP2C9</i>  | Intron     | T  | 7.70 x 10 <sup>-3</sup> | 2.39 | 1.27 - 4.36 | 0.61            | 0.39                | NGS    |
| 10  | rs2096069               | 96720032 | <i>CYP2C9</i>  | Intron     | T  | 1.04 x 10 <sup>-2</sup> | 2.39 | 1.28 - 4.38 | 0.55            | 0.34                | NGS    |
| 12  | rs3764006               | 21054369 | <i>SLCO1B3</i> | Exon       | G  | 1.35 x 10 <sup>-3</sup> | 3.64 | 1.70 - 7.83 | 0.35            | 0.13                | DMET   |
| 8   | rs16936279              | 70584809 | <i>SLCO5A1</i> | 3'-UTR     | G  | 5.79 x 10 <sup>-3</sup> | 2.56 | 1.26 - 5.20 | 0.33            | 0.16                | DMET   |
| 7   | rs10276036              | 87180198 | <i>ABCB1</i>   | Intron     | G  | 1.47 x 10 <sup>-3</sup> | 2.88 | 1.53 - 5.43 | 0.52            | 0.27                | DMET   |
| 16  | rs4783745               | 66970975 | <i>CES2</i>    | Intron     | G  | 2.97 x 10 <sup>-3</sup> | 2.96 | 1.49 - 5.86 | 0.38            | 0.17                | DMET   |

**Table S5.** Univariate regression analysis using warfarin daily dose as dependent variable. Variants are displayed in increasing order of P-values and by gene locus.

| Chr | SNV ID                  | Position | Gene          | P-value Univariate     | Beta  | Method |
|-----|-------------------------|----------|---------------|------------------------|-------|--------|
| 16  | <i>VKORC1</i> -1639 G>A | 31107689 | <i>VKORC1</i> | $2.54 \times 10^{-11}$ | -1.83 | DMET   |
| 16  | rs2359612               | 31103796 | <i>VKORC1</i> | $8.23 \times 10^{-11}$ | -1.75 | DMET   |
| 16  | rs9934438               | 31104878 | <i>VKORC1</i> | $1.75 \times 10^{-10}$ | -1.78 | DMET   |
| 16  | rs8050894               | 31104509 | <i>VKORC1</i> | $1.20 \times 10^{-7}$  | -1.53 | DMET   |
| 16  | rs2884737               | 31105554 | <i>VKORC1</i> | $4.54 \times 10^{-6}$  | -1.84 | DMET   |
| 16  | rs7294                  | 31102321 | <i>VKORC1</i> | $5.06 \times 10^{-5}$  | 1.26  | DMET   |
| 16  | rs17878544              | 31107927 | <i>VKORC1</i> | $6.70 \times 10^{-3}$  | 1.86  | DMET   |
| 16  | rs11150606              | 31099011 | <i>PRSS53</i> | $9.99 \times 10^{-4}$  | -2.03 | DMET   |
| 10  | rs2860905               | 96702295 | <i>CYP2C9</i> | $5.98 \times 10^{-8}$  | -1.87 | NGS    |
| 10  | rs9332220               | 96743943 | <i>CYP2C9</i> | $6.54 \times 10^{-7}$  | -1.78 | NGS    |
| 10  | rs1934963               | 96734676 | <i>CYP2C9</i> | $5.06 \times 10^{-7}$  | -1.81 | NGS    |
| 10  | rs61886788              | 96694843 | <i>CYP2C9</i> | $6.73 \times 10^{-7}$  | -1.77 | NGS    |
| 10  | rs28371677              | 96702472 | <i>CYP2C9</i> | $2.30 \times 10^{-6}$  | -1.69 | NGS    |
| 10  | rs4918797               | 96750251 | <i>CYP2C9</i> | $1.38 \times 10^{-6}$  | -1.75 | NGS    |
| 10  | rs4917639               | 96725535 | <i>CYP2C9</i> | $1.18 \times 10^{-6}$  | -1.79 | NGS    |
| 10  | rs9332172               | 96731788 | <i>CYP2C9</i> | $1.16 \times 10^{-6}$  | -1.73 | NGS    |
| 10  | rs61886769              | 96695080 | <i>CYP2C9</i> | $1.04 \times 10^{-6}$  | -1.76 | NGS    |
| 10  | rs4086116               | 96707202 | <i>CYP2C9</i> | $1.04 \times 10^{-6}$  | -1.76 | NGS    |
| 10  | <i>CYP2C9</i> *2        | 96702047 | <i>CYP2C9</i> | $8.03 \times 10^{-5}$  | -1.79 | NGS    |
| 10  | rs1856908               | 96732731 | <i>CYP2C9</i> | $5.15 \times 10^{-4}$  | 1.00  | NGS    |
| 10  | rs2096069               | 96720032 | <i>CYP2C9</i> | $6.60 \times 10^{-4}$  | 0.96  | NGS    |
| 10  | <i>CYP2C9</i> *3        | 96741053 | <i>CYP2C9</i> | $8.26 \times 10^{-3}$  | -1.66 | NGS    |
| 10  | rs1934965               | 96737935 | <i>CYP2C9</i> | $1.28 \times 10^{-3}$  | 0.91  | NGS    |
| 10  | rs2475376               | 96712400 | <i>CYP2C9</i> | $5.80 \times 10^{-3}$  | 1.02  | NGS    |
| 10  | rs1057911               | 96748737 | <i>CYP2C9</i> | $3.24 \times 10^{-3}$  | -1.77 | DMET   |
| 19  | rs3093106               | 16008257 | <i>CYP4F2</i> | $6.28 \times 10^{-5}$  | 1.55  | DMET   |
| 19  | <i>CYP4F2</i> *3        | 15990431 | <i>CYP4F2</i> | $1.59 \times 10^{-3}$  | 1.02  | DMET   |
| 17  | rs2952151               | 37828496 | <i>PGAP3</i>  | $1.19 \times 10^{-3}$  | 0.93  | DMET   |

| Chr | SNV ID     | Position  | Gene           | P-value Univariate    | Beta  | Method |
|-----|------------|-----------|----------------|-----------------------|-------|--------|
| 1   | rs2020870  | 171154959 | <i>FMO2</i>    | $2.10 \times 10^{-3}$ | 1.62  | DMET   |
| 16  | rs4783745  | 66970975  | <i>CES2</i>    | $6.85 \times 10^{-3}$ | 0.93  | DMET   |
| 12  | rs3764006  | 21054369  | <i>SLCO1B3</i> | $2.24 \times 10^{-2}$ | 0.89  | DMET   |
| 8   | rs16936279 | 70584809  | <i>SLCO5A1</i> | $1.05 \times 10^{-2}$ | 1.04  | DMET   |
| 7   | rs10276036 | 87180198  | <i>ABCB1</i>   | $8.40 \times 10^{-2}$ | 0.55  | DMET   |
| 19  | rs57266494 | 41703793  | <i>CYP2SI</i>  | $3.63 \times 10^{-2}$ | -1.60 | DMET   |
| 13  | rs1801246  | 52520507  | <i>ATP7B</i>   | $5.24 \times 10^{-2}$ | -1.94 | DMET   |

**Table S6.** Genotyping call rates and Hardy-Weinberg equilibrium P-values of genetic variants with stronger association with warfarin dose requirements. NA indicates that genotyping call rate did not apply since information was obtained from sequencing not genotyping data.

| Chr | SNV ID                  | Gene          | Genotyping call rate | Observed heterozygosity | Expected heterozygosity | HWE P-value |
|-----|-------------------------|---------------|----------------------|-------------------------|-------------------------|-------------|
| 1   | rs2020870               | <i>FMO2</i>   | 98.9                 | 0.09                    | 0.20                    | 0.03        |
| 10  | <i>CYP2C9*2</i>         | <i>CYP2C9</i> | NA                   | 0.05                    | 0.09                    | 0.08        |
| 10  | rs2860905               | <i>CYP2C9</i> | NA                   | 0.16                    | 0.19                    | 0.34        |
| 10  | rs1856908               | <i>CYP2C9</i> | NA                   | 0.55                    | 0.49                    | 0.53        |
| 10  | <i>CYP2C9*3</i>         | <i>CYP2C9</i> | NA                   | 0.08                    | 0.07                    | 1.00        |
| 16  | <i>VKORC1</i> -1639 G>A | <i>VKORC1</i> | 97.9                 | 0.47                    | 0.36                    | 0.15        |
| 16  | rs4783745               | <i>CES2</i>   | 98.8                 | 0.28                    | 0.28                    | 1.00        |
| 19  | <i>CYP4F2*3</i>         | <i>CYP4F2</i> | 100                  | 0.47                    | 0.42                    | 0.68        |
| 19  | rs3093106               | <i>CYP4F2</i> | 100                  | 0.31                    | 0.30                    | 1.00        |



**Table S7.** Linear regression analysis conditioned to known drug-response alleles (*VKORC1* -1639 G>A, *CYP2C9\*2* and *CYP2C9\*3*). P-values correspond to the tested SNVs after conditioning for the drug-response alleles.

| Chr | SNV ID                  | Position  | Gene          | P-value Univariate     | P-value after <i>VKORC1</i> -1639 G>A | P-value after <i>VKORC1</i> and <i>CYP2C9*2</i> | P-value after <i>VKORC1</i> , <i>CYP2C9*2</i> & <i>CYP2C9*3</i> | Expected effect on warfarin dose | Method |
|-----|-------------------------|-----------|---------------|------------------------|---------------------------------------|-------------------------------------------------|-----------------------------------------------------------------|----------------------------------|--------|
| 16  | <i>VKORC1</i> -1639 G>A | 31107689  | <i>VKORC1</i> | $2.54 \times 10^{-11}$ | NA                                    | NA                                              | NA                                                              | Decrease                         | DMET   |
| 10  | rs2860905               | 96702295  | <i>CYP2C9</i> | $5.98 \times 10^{-8}$  | $4.62 \times 10^{-6}$                 | $4.59 \times 10^{-3}$                           | $2.76 \times 10^{-1}$                                           | Decrease                         | NGS    |
| 10  | <i>CYP2C9*2</i>         | 96702047  | <i>CYP2C9</i> | $8.03 \times 10^{-5}$  | $1.34 \times 10^{-4}$                 | NA                                              | NA                                                              | Decrease                         | NGS    |
| 10  | rs1856908               | 96732731  | <i>CYP2C9</i> | $5.15 \times 10^{-4}$  | $6.32 \times 10^{-4}$                 | $1.74 \times 10^{-1}$                           | $1.29 \times 10^{-1}$                                           | Increase                         | NGS    |
| 10  | <i>CYP2C9*3</i>         | 96741053  | <i>CYP2C9</i> | $8.26 \times 10^{-3}$  | $7.18 \times 10^{-3}$                 | $2.17 \times 10^{-3}$                           | NA                                                              | Decrease                         | NGS    |
| 19  | rs3093106               | 16008257  | <i>CYP4F2</i> | $6.28 \times 10^{-5}$  | $1.08 \times 10^{-4}$                 | $2.15 \times 10^{-4}$                           | $3.33 \times 10^{-4}$                                           | Increase                         | DMET   |
| 19  | <i>CYP4F2*3</i>         | 15990431  | <i>CYP4F2</i> | $1.59 \times 10^{-3}$  | $1.14 \times 10^{-3}$                 | $3.72 \times 10^{-3}$                           | $2.49 \times 10^{-3}$                                           | Increase                         | DMET   |
| 1   | rs2020870               | 171154959 | <i>FMO2</i>   | $2.10 \times 10^{-3}$  | $2.69 \times 10^{-2}$                 | $3.26 \times 10^{-2}$                           | $6.75 \times 10^{-2}$                                           | Increase                         | DMET   |
| 16  | rs4783745               | 66970975  | <i>CES2</i>   | $6.85 \times 10^{-3}$  | $5.56 \times 10^{-3}$                 | $3.50 \times 10^{-3}$                           | $1.48 \times 10^{-2}$                                           | Increase                         | DMET   |

**Table S8.** Linear regression analysis of SNVs associated with warfarin response using demographic and clinical factors as covariates. P-values correspond to the tested SNV after including the covariate. Variants are displayed by increasing order of P-values (univariate analysis) and by gene locus.

| SNV ID                  | Gene          | P-value univariate     | P-value for age as covariate | P-value for weight as covariate | P-value for deep vein thrombosis as covariate | P-value for hypertension as covariate | P-value for diabetes as covariate | P-value statins as covariate | P-value azoles as covariate | P-value for ACE inhibitors covariate |
|-------------------------|---------------|------------------------|------------------------------|---------------------------------|-----------------------------------------------|---------------------------------------|-----------------------------------|------------------------------|-----------------------------|--------------------------------------|
| <i>VKORC1</i> -1639 G>A | <i>VKORC1</i> | $2.54 \times 10^{-11}$ | $1.05 \times 10^{-11}$       | $4.45 \times 10^{-11}$          | $2.84 \times 10^{-11}$                        | $4.12 \times 10^{-11}$                | $3.95 \times 10^{-11}$            | $7.40 \times 10^{-11}$       | $3.06 \times 10^{-11}$      | $2.42 \times 10^{-11}$               |
| rs2860905               | <i>CYP2C9</i> | $5.98 \times 10^{-8}$  | $1.34 \times 10^{-8}$        | $4.66 \times 10^{-8}$           | $7.27 \times 10^{-8}$                         | $8.18 \times 10^{-8}$                 | $3.14 \times 10^{-7}$             | $2.26 \times 10^{-7}$        | $1.20 \times 10^{-7}$       | $6.73 \times 10^{-8}$                |
| <i>CYP2C9</i> *2        | <i>CYP2C9</i> | $8.03 \times 10^{-5}$  | $1.50 \times 10^{-4}$        | $1.04 \times 10^{-4}$           | $1.67 \times 10^{-4}$                         | $6.81 \times 10^{-5}$                 | $3.59 \times 10^{-4}$             | $1.85 \times 10^{-4}$        | $2.63 \times 10^{-4}$       | $8.59 \times 10^{-5}$                |
| rs1856908               | <i>CYP2C9</i> | $5.15 \times 10^{-4}$  | $7.96 \times 10^{-4}$        | $4.40 \times 10^{-4}$           | $1.22 \times 10^{-3}$                         | $3.29 \times 10^{-4}$                 | $2.71 \times 10^{-3}$             | $2.16 \times 10^{-3}$        | $3.55 \times 10^{-3}$       | $5.52 \times 10^{-4}$                |
| <i>CYP2C9</i> *3        | <i>CYP2C9</i> | $8.26 \times 10^{-3}$  | $3.72 \times 10^{-3}$        | $9.63 \times 10^{-3}$           | $1.00 \times 10^{-2}$                         | $8.53 \times 10^{-3}$                 | $9.54 \times 10^{-3}$             | $1.10 \times 10^{-2}$        | $9.90 \times 10^{-3}$       | $8.58 \times 10^{-3}$                |
| rs3093106               | <i>CYP4F2</i> | $6.28 \times 10^{-5}$  | $5.25 \times 10^{-5}$        | $6.28 \times 10^{-5}$           | $5.50 \times 10^{-4}$                         | $4.45 \times 10^{-5}$                 | $1.32 \times 10^{-4}$             | $1.06 \times 10^{-4}$        | $6.27 \times 10^{-5}$       | $6.62 \times 10^{-5}$                |
| <i>CYP4F2</i> *3        | <i>CYP4F2</i> | $1.59 \times 10^{-3}$  | $3.87 \times 10^{-4}$        | $7.67 \times 10^{-4}$           | $1.64 \times 10^{-2}$                         | $1.45 \times 10^{-3}$                 | $3.06 \times 10^{-3}$             | $7.80 \times 10^{-4}$        | $1.15 \times 10^{-3}$       | $1.65 \times 10^{-3}$                |
| rs2020870               | <i>FMO2</i>   | $2.10 \times 10^{-3}$  | $5.37 \times 10^{-3}$        | $2.66 \times 10^{-3}$           | $1.29 \times 10^{-3}$                         | $2.68 \times 10^{-3}$                 | $4.47 \times 10^{-3}$             | $6.12 \times 10^{-3}$        | $5.04 \times 10^{-3}$       | $1.92 \times 10^{-3}$                |
| rs4783745               | <i>CES2</i>   | $6.85 \times 10^{-3}$  | $8.30 \times 10^{-3}$        | $6.68 \times 10^{-3}$           | $1.13 \times 10^{-2}$                         | $8.67 \times 10^{-3}$                 | $1.15 \times 10^{-2}$             | $6.68 \times 10^{-3}$        | $1.34 \times 10^{-2}$       | $6.63 \times 10^{-3}$                |

**Table S9.** Main haplotypes that include rs2860905 identified in Puerto Ricans using warfarin and Puerto Ricans from 1000 Genomes Project.

| Position        | rs number        | Ref      | Alt      | H1       | H2       | H3       | H4       |
|-----------------|------------------|----------|----------|----------|----------|----------|----------|
| 96694843        | rs61886768       | A        | G        | 1        | 1        | 1        | 0        |
| 96697344        | rs4917636        | A        | G        | 1        | 0        | 0        | 0        |
| 96700537        | rs2253635        | C        | T        | 1        | 1        | 1        | 1        |
| 96701601        | rs9332119        | G        | C        | 1        | 0        | 0        | 0        |
| 96702047        | rs1799853        | G        | A        | 1        | 0        | 0        | 0        |
| 96702066        | rs7900194        | C        | T        | 0        | 0        | 0        | 1        |
| <b>96702295</b> | <b>rs2860905</b> | <b>G</b> | <b>A</b> | <b>1</b> | <b>1</b> | <b>1</b> | <b>1</b> |
| 96702472        | rs28371677       | A        | G        | 1        | 1        | 1        | 1        |
| 96702556        | rs41291560       | T        | C        | 1        | 0        | 0        | 0        |
| 96706409        | rs12772675       | C        | G        | 1        | 1        | 1        | 1        |
| 96707202        | rs4086116        | C        | T        | 1        | 1        | 1        | 0        |
| 96707890        | rs17443251       | T        | C        | 1        | 0        | 0        | 0        |
| 96724838        | rs9332163        | G        | A        | 1        | 0        | 0        | 0        |
| 96725535        | rs4917639        | A        | C        | 1        | 1        | 1        | 0        |
| 96731788        | rs9332172        | A        | G        | 1        | 1        | 1        | 1        |
| 96734676        | rs1934963        | T        | C        | 1        | 1        | 1        | 0        |
| 96741053        | rs1057910        | A        | C        | 0        | 1        | 0        | 0        |
| 96741058        | rs28371686       | C        | G        | 0        | 0        | 0        | 0        |
| 96741795        | rs2153629        | A        | G        | 1        | 0        | 0        | 0        |
| 96743108        | rs9332214        | T        | C        | 0        | 1        | 0        | 0        |
| 96743228        | rs9332217        | A        | C        | 0        | 1        | 0        | 0        |
| 96743943        | rs9332220        | G        | A        | 1        | 1        | 1        | 0        |
| 96744064        | rs9332222        | G        | A        | 1        | 0        | 0        | 0        |
| 96744732        | rs114628972      | C        | T        | 0        | 1        | 0        | 0        |
| 96744890        | rs77582920       | A        | T        | 0        | 1        | 0        | 0        |
| 96745180        | rs9332227        | T        | G        | 0        | 1        | 0        | 0        |
| 96745984        | rs9332230        | A        | T        | 0        | 1        | 0        | 0        |
| 96748492        | rs9332238        | G        | A        | 1        | 1        | 0        | 0        |

| <b>Position</b>  | <b>rs number</b> | <b>Ref</b> | <b>Alt</b> | <b>H1</b> | <b>H2</b> | <b>H3</b> | <b>H4</b> |
|------------------|------------------|------------|------------|-----------|-----------|-----------|-----------|
| 96750251         | rs4918797        | C          | T          | 1         | 1         | 1         | 0         |
| <b>Frequency</b> |                  |            |            |           |           |           |           |
|                  | Warfarin         |            |            | 22/216    | 11/216    | 3/216     | 2/216     |
|                  | PUR              |            |            | 27/208    | 9/208     | 6/208     | 1/208     |
|                  | CEU              |            |            | 12/198    | 11/198    | 0/198     | 0/198     |
|                  | AFR              |            |            | 0/414     | 0/414     | 75/414    | 22/414    |
|                  | CHB              |            |            | 0/206     | 7/206     | 8/206     | 0/206     |

**Table S10.** Multivariate regression analysis using *CYP2C9\*2* and *CYP2C9\*3* as variables excluding rs2860905. Other variables considered for the warfarin dose prediction model that were significant are also included. Each variable is listed in order of significance for a stepwise regression model

| Added predictor                | R                  | R Square | Adjusted R Square | R Square Change | Partial regression coefficient | Std. Error of the Estimate | F Change | Sig. F Change | Standard error | P-value |
|--------------------------------|--------------------|----------|-------------------|-----------------|--------------------------------|----------------------------|----------|---------------|----------------|---------|
| Constant                       |                    |          |                   |                 | 7.272                          | 1.054                      |          |               |                | <0.001  |
| rs9923231; <i>VKORC1</i> -1639 | 0.554 <sup>a</sup> | 0.307    | 0.300             | 0.307           | -1.710                         | 1.79862                    | 49.949   | 0.000         | 0.191          | <0.001  |
| rs1856908; <i>CYP2C9</i>       | 0.656 <sup>b</sup> | 0.431    | 0.420             | 0.124           | 0.723                          | 1.63707                    | 24.403   | 0.000         | 0.200          | <0.001  |
| rs10276036; <i>ABCB1</i>       | 0.696 <sup>c</sup> | 0.485    | 0.471             | 0.054           | 0.786                          | 1.56421                    | 11.677   | 0.001         | 0.199          | <0.001  |
| rs4783745; <i>CES2</i>         | 0.727 <sup>d</sup> | 0.528    | 0.511             | 0.043           | 0.591                          | 1.50369                    | 10.115   | 0.002         | 0.223          | 0.009   |
| <i>CYP2C9*2</i>                | 0.742 <sup>e</sup> | 0.551    | 0.531             | <b>0.023</b>    | -0.936                         | 1.47324                    | 5.593    | 0.020         | 0.361          | 0.011   |
| Age                            | 0.758 <sup>f</sup> | 0.575    | 0.551             | 0.023           | -0.032                         | 1.44113                    | 5.913    | 0.017         | 0.013          | 0.016   |
| Diabetes                       | 0.766 <sup>g</sup> | 0.587    | 0.560             | 0.013           | 0.598                          | 1.42594                    | 3.312    | 0.072         | 0.282          | 0.036   |
| Hypertension                   | 0.777 <sup>h</sup> | 0.604    | 0.574             | 0.017           | -0.638                         | 1.40339                    | 4.467    | 0.037         | 0.292          | 0.031   |
| <i>CYP2C9*3</i>                | 0.782 <sup>i</sup> | 0.611    | 0.578             | <b>0.007</b>    | -0.526                         | 1.39727                    | 1.931    | 0.168         | 0.379          | 0.168   |

a. Predictor: rs9923231

b. Predictor: rs9923231 and rs1856908

c. Predictor: rs9923231, rs1856908 and rs10276036

d. Predictor: rs9923231, rs1856908, rs10276036 and rs4783745

e. Predictor: rs9923231, rs1856908, rs10276036, rs4783745 and *CYP2C9\*2*

f. Predictor: rs9923231, rs1856908, rs10276036, rs4783745, *CYP2C9\*2* and age

g. Predictor: rs9923231, rs1856908, rs10276036, rs4783745, *CYP2C9\*2*, age and diabetes

h. Predictor: rs9923231, rs1856908, rs10276036, rs4783745, *CYP2C9\*2*, age, diabetes and hypertension

i. Predictor: rs9923231, rs1856908, rs10276036, rs4783745, *CYP2C9\*2*, age, diabetes, hypertension and *CYP2C9\*3*

**Table S11.** Predicted deleteriousness of low-frequency variants in *CYP2C9* locus identified with NGS. Grantham, SIFT and PolyPhen are protein level scores. GERP, PhastCons and PhyloP are conservation scores. NA stands for not available.

| SNP ID            | Position | Gene          | Change | Type            | Effect                      | Grantham | PolyP | SIFT | PhastCons (mammals) | PhyloP (mammals) | GERP   | C-score |
|-------------------|----------|---------------|--------|-----------------|-----------------------------|----------|-------|------|---------------------|------------------|--------|---------|
| <i>CYP2C9</i> *11 | 96740981 | <i>CYP2C9</i> | C>T    | Missense        | Arg335Trp                   | 101      | 0.914 | 0.00 | 0.893               | 0.91             | 2.85   | 27.9    |
| <i>CYP2C9</i> *21 | 96698528 | <i>CYP2C9</i> | C>T    | Missense        | Pro30Leu                    | 98       | 0.997 | 0.01 | 0.299               | 0.856            | 2.78   | 25.1    |
| <i>CYP2C9</i> *9  | 96708974 | <i>CYP2C9</i> | A>G    | Missense        | His251Arg                   | 29       | 0.98  | 0.00 | 0.124               | 1.45             | 3.19   | 23.8    |
| <i>CYP2C9</i> *5  | 96741058 | <i>CYP2C9</i> | C>G    | Missense        | Asp360Glu                   | 0        | 0.93  | 0.00 | 0.23                | 0.02             | -0.53  | 23.5    |
| <i>CYP2C9</i> *12 | 96748777 | <i>CYP2C9</i> | C>T    | Missense        | Pro489Ser                   | 74       | 0.681 | 0.00 | 0.464               | 0.77             | 2.50   | 23.5    |
| rs149158426       | 96709023 | <i>CYP2C9</i> | G>A    | Synonymous      | +19 bps splicing site       | NA       | NA    | NA   | 0.99                | 1.84             | 3.29   | 15.43   |
| rs55894764        | 31106015 | <i>VKORC1</i> | C>T    | Synonymous      | Arg12Arg                    | NA       | NA    | NA   | 0.997               | 0.604            | 2.54   | 15.25   |
| <i>CYP2C9</i> *36 | 96698440 | <i>CYP2C9</i> | A>G    | Initiator codon | Loss of transcription start | NA       | NA    | NA   | 0.862               | 1.65             | 3.69   | 15.14   |
| NA                | 31107155 | <i>VKORC1</i> | C>T    | Regulatory      | Regulatory                  | NA       | NA    | NA   | 0.777               | -0.239           | -1.150 | 13      |
| <i>CYP2C9</i> *8  | 96702066 | <i>CYP2C9</i> | G>A    | Missense        | Arg150His                   | 29       | 0.005 | 0.33 | 0.00                | -0.89            | -4.34  | 7.88    |

**Table S12.** Minor allele frequencies of low-frequency variants among Puerto Ricans, Africans and Americans or Hispanics (Puerto Ricans, Mexican Americans, Peruvians and Colombians) from the 1000 Genomes Project.

| Gene          | SNV ID      | Variant          | MAF<br>AFR | MAF<br>AMR | MAF<br>EUR | MAF<br>Warf |
|---------------|-------------|------------------|------------|------------|------------|-------------|
| <i>CYP2C9</i> | rs142240658 | <i>CYP2C9*21</i> | <0.001     | 0.0003     | 0.000      | 0.005       |
| <i>CYP2C9</i> | rs114071557 | <i>CYP2C9*36</i> | 0.001      | 0.000      | 0.000      | 0.009       |
| <i>CYP2C9</i> | rs7900194   | <i>CYP2C9*8</i>  | 0.053      | 0.001      | 0.001      | 0.019       |
| <i>CYP2C9</i> | rs2256871   | <i>CYP2C9*9</i>  | 0.082      | 0.001      | 0.001      | 0.019       |
| <i>CYP2C9</i> | rs149158426 | Not found        | 0.000      | 0.006      | 0.000      | 0.004       |
| <i>CYP2C9</i> | rs28371685  | <i>CYP2C9*11</i> | 0.024      | 0.001      | 0.002      | 0.009       |
| <i>CYP2C9</i> | rs28371686  | <i>CYP2C9*5</i>  | 0.017      | 0.001      | 0.000      | 0.014       |
| <i>CYP2C9</i> | rs9332339   | <i>CYP2C9*12</i> | 0.000      | 0.000      | 0.000      | 0.005       |
| <i>VKORC1</i> | rs55894764  | rs55894764       | 0.000      | 0.019      | 0.030      | 0.014       |
| <i>VKORC1</i> | Not found   | Not found        | 0.000      | 0.000      | 0.000      | 0.004       |

**Table S13.** Reported ancestral proportions in Puerto Ricans from previous studies.

| <b>Population</b>                       | <b>n</b>                        | <b>No. AIMs</b> | <b>African (%)</b> | <b>European (%)</b> | <b>Native American (%)</b> | <b>Reference</b>                            |
|-----------------------------------------|---------------------------------|-----------------|--------------------|---------------------|----------------------------|---------------------------------------------|
| Warfarin                                | 103                             | 71              | 15.7               | 58.8                | 25.5                       | NA                                          |
| PUR (1000 Genomes Project)              | 104                             | 71              | 16.8               | 68.3                | 14.8                       | (The 1000 Genomes Project Consortium, 2015) |
| Puerto Ricans (Via et al. 2011)         | 642                             | 93              | 21.2               | 63.7                | 15.2                       | (Via et al., 2011)                          |
| Boston Puerto Rican Health study        | 1129                            | 100             | 27.4               | 57.2                | 15.4                       | (Lai et al., 2009)                          |
| Asthma in Latino Americans from US GALA | 181 (asthma) and 178 (controls) | 44              | 16.0               | 66.0                | 18.0                       | (Choudhry et al., 2007)                     |



**Figure S1. (A)** Coverage of custom panel of primers obtained with Ion AmpliSeq Designer™ for CYP2C9 and VKORC1. The top of the figure shows the position of the genomic targeted regions. The targeted genes are display in royal blue. Each block is an exon within the gene. The continuous light blue bar at the bottom indicates the submitted region to be targeted for sequencing, the green bars represent the region on which primers were designed and red bars indicate regions on which a primer was not designed following the AmpliSeq Designer™ algorithm. **(B)** Quantitative summary of targeted genomic regions.

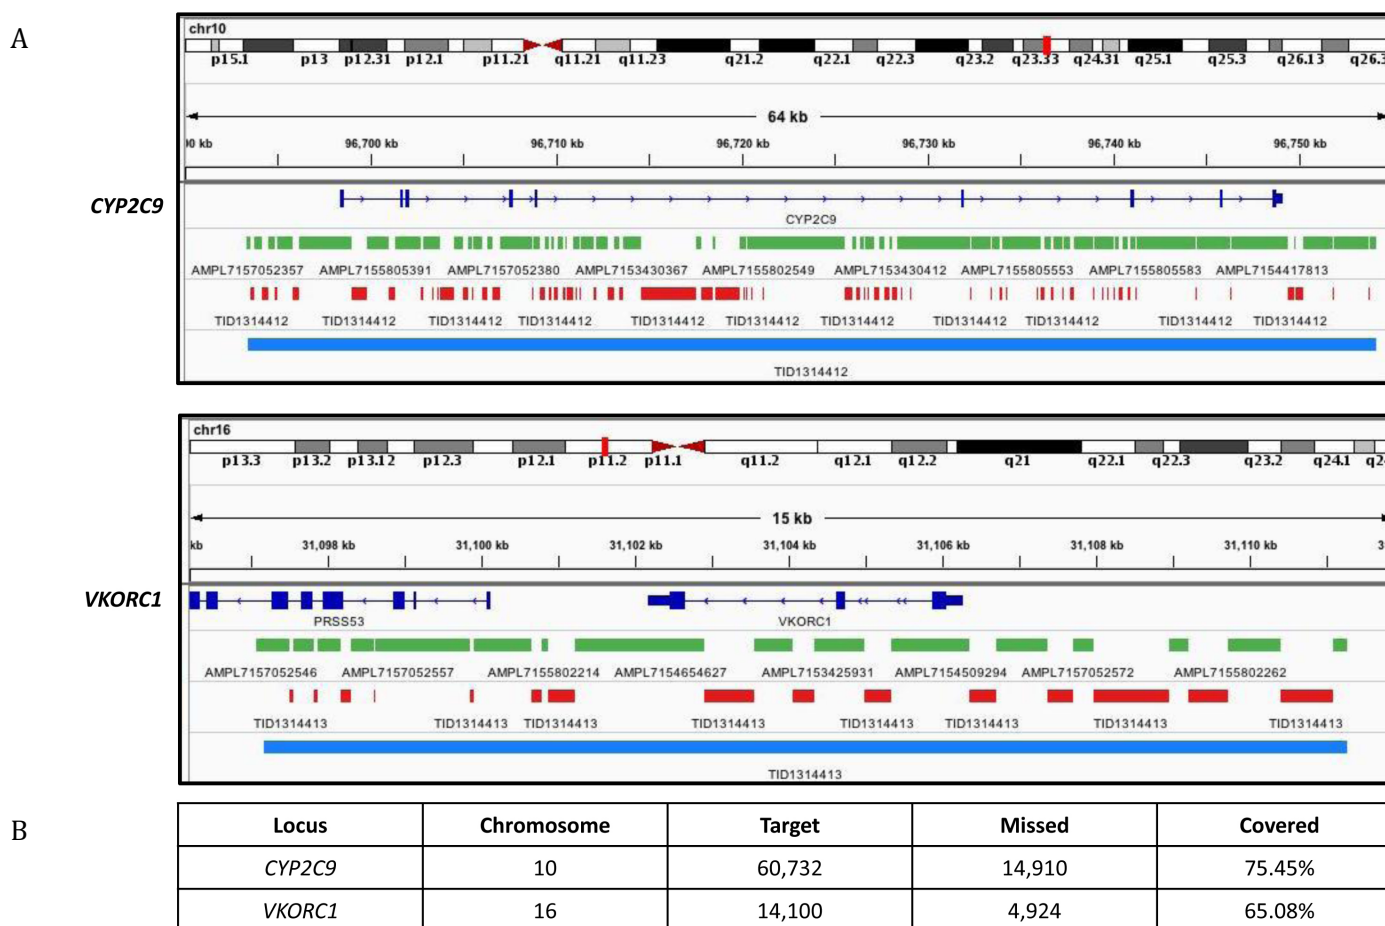

**Figure S2.** Location of SNVs found at (A) chromosome 10, *CYP2C9* locus (top) and (B) chromosome 16, *VKORC1* locus (bottom) with NGS. The top of the figures represents the genomic location of the variant at chromosome 10 and 16 within a span of 88kb and 14 Kb respectively. The top bar plot represents the location of each SNP colored according to genotypes: royal blue is the proportion of heterozygous while red is the proportion of homozygous for the variant allele. Below, each row represents a single individual with its variants colored in cyan when the patients is homozygous and in royal blue when is heterozygous.

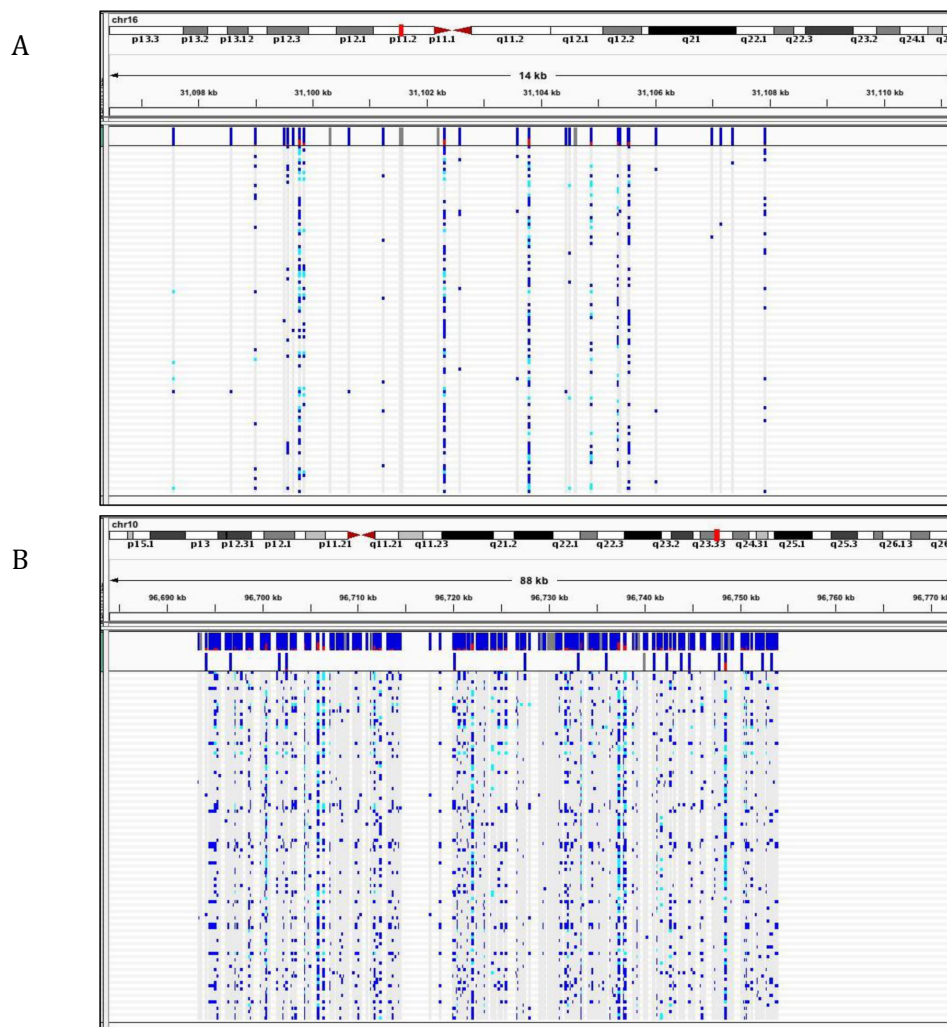

**Figure S3.** Genetic proportions of Puerto Ricans treated with warfarin and Puerto Ricans from the 1000 Genomes Project using Hispanic parental populations as reference. Top: The triangle plot shows the clustering of the Puerto Rican patients taking warfarin (pink) and Puerto Ricans from the 1000 Genomes Project (yellow) when compared to the reference populations: Caucasians, Africans and Native Americans. Bottom: The bar plot indicates the ancestral proportions from each reference population. Each bar represents a single individual. Blue, red and green indicate the contribution of Native American, African and Caucasian populations respectively.

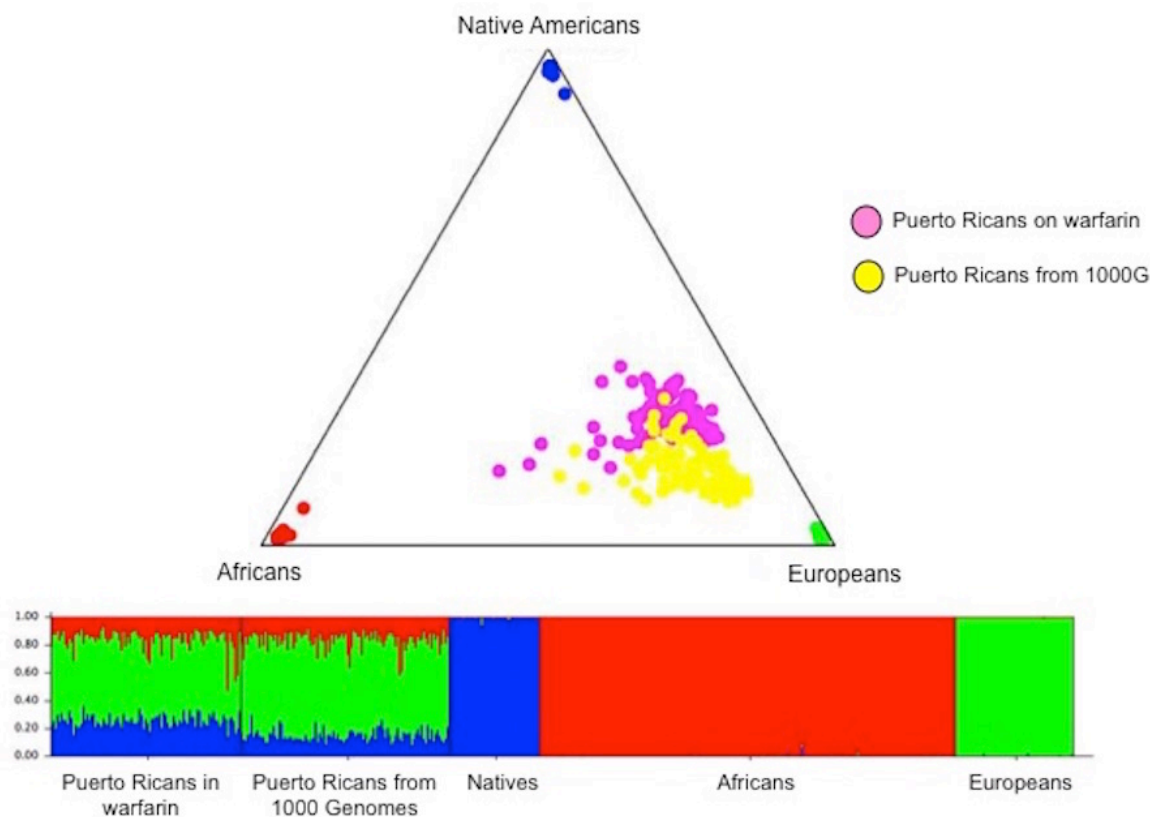

**Figure S4.** Principal component analysis (PCA) of the Puerto Rican cohort under warfarin and Puerto Ricans from the 1000 Genomes Project using Hispanic parental populations as reference.

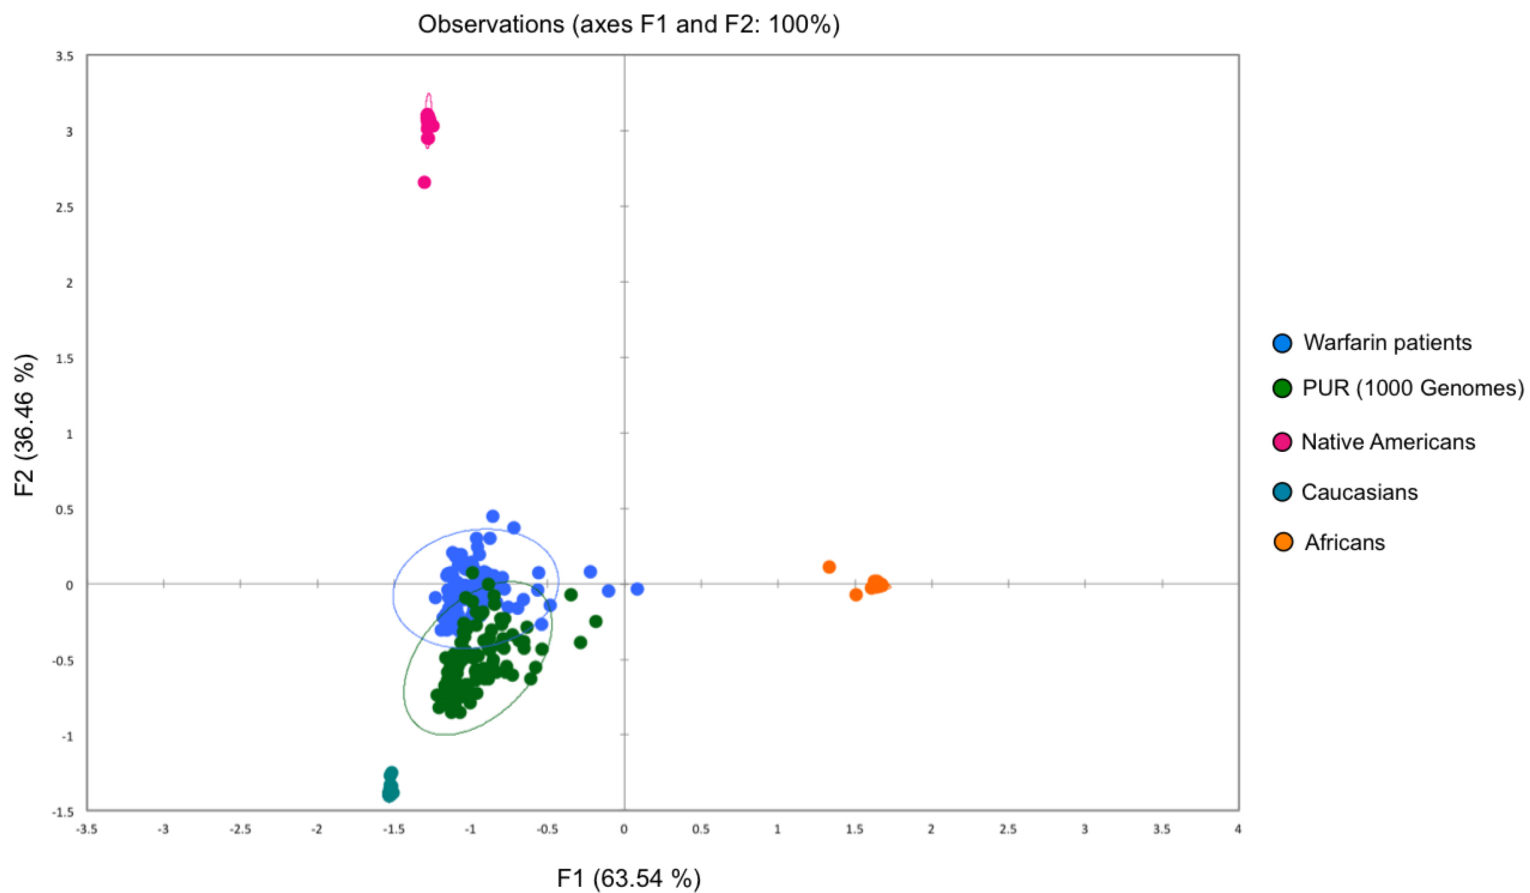

**Figure S5.** Histogram of Wright's  $F_{st}$  values calculations to evaluate divergence from the Native American component of Puerto Ricans under warfarin therapy and Puerto Ricans (PUR) from the 1000 Genomes Project.

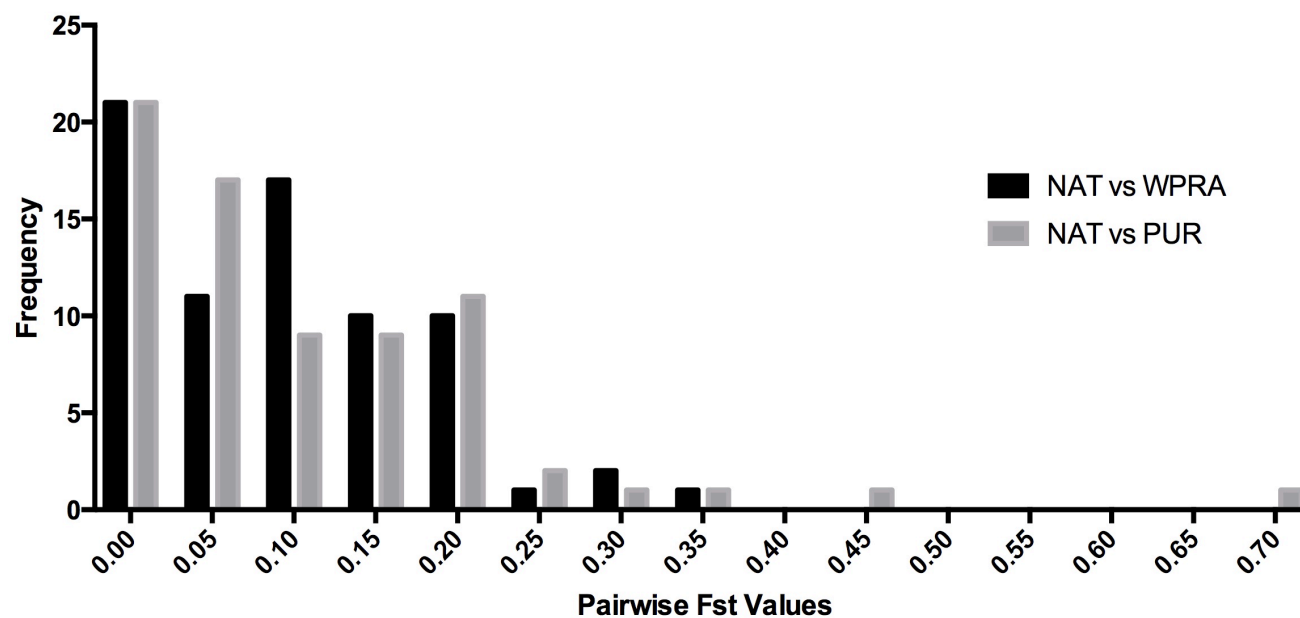

**Figure S6.** Linkage disequilibrium patterns in *CYP2C9* across (A) Europeans, (B) Africans and (C) Asians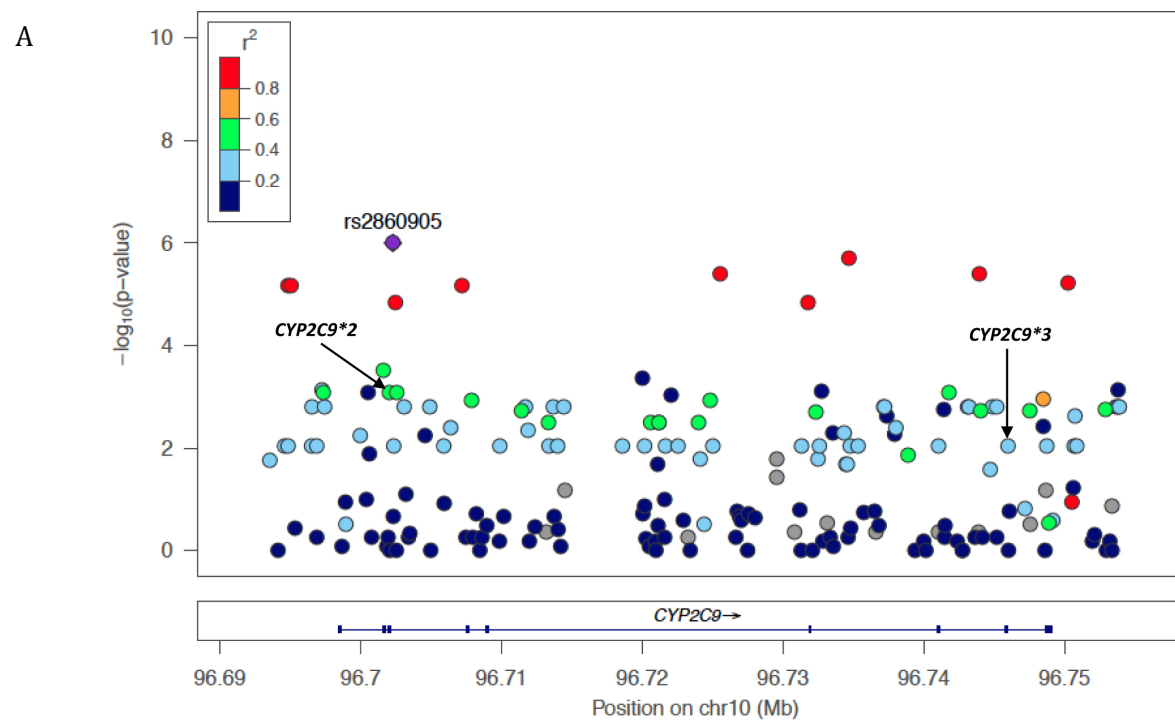

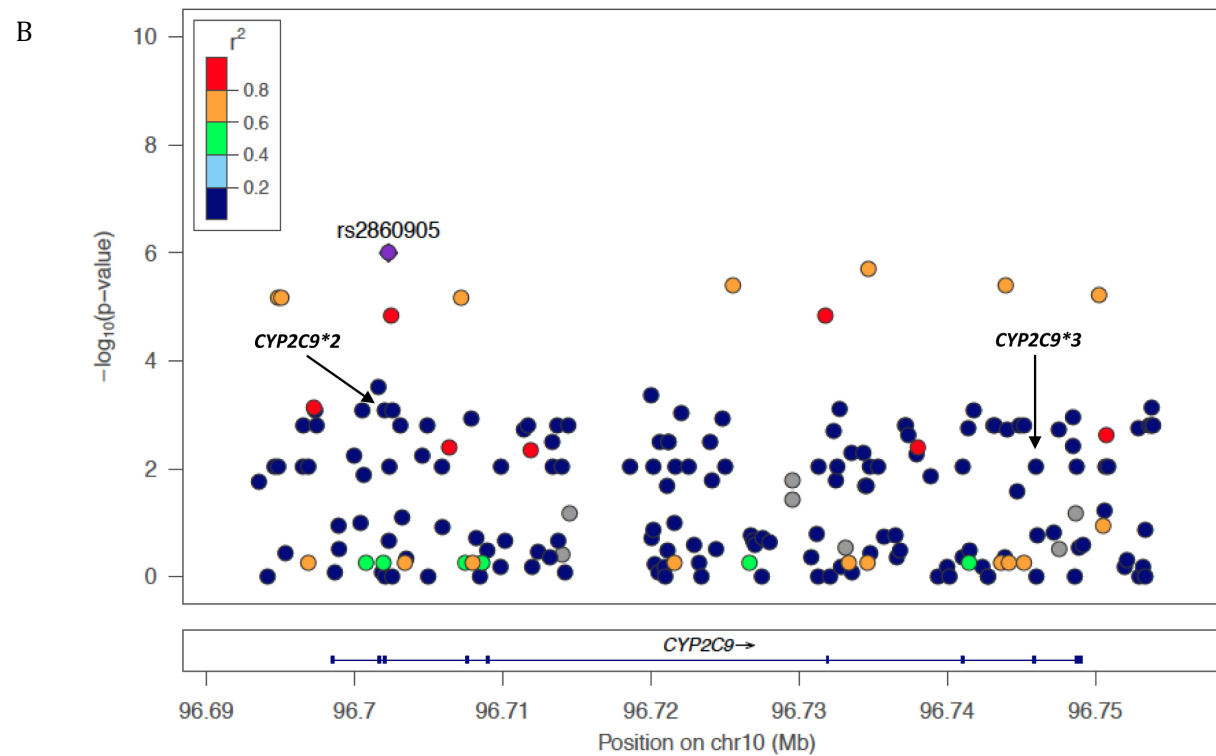

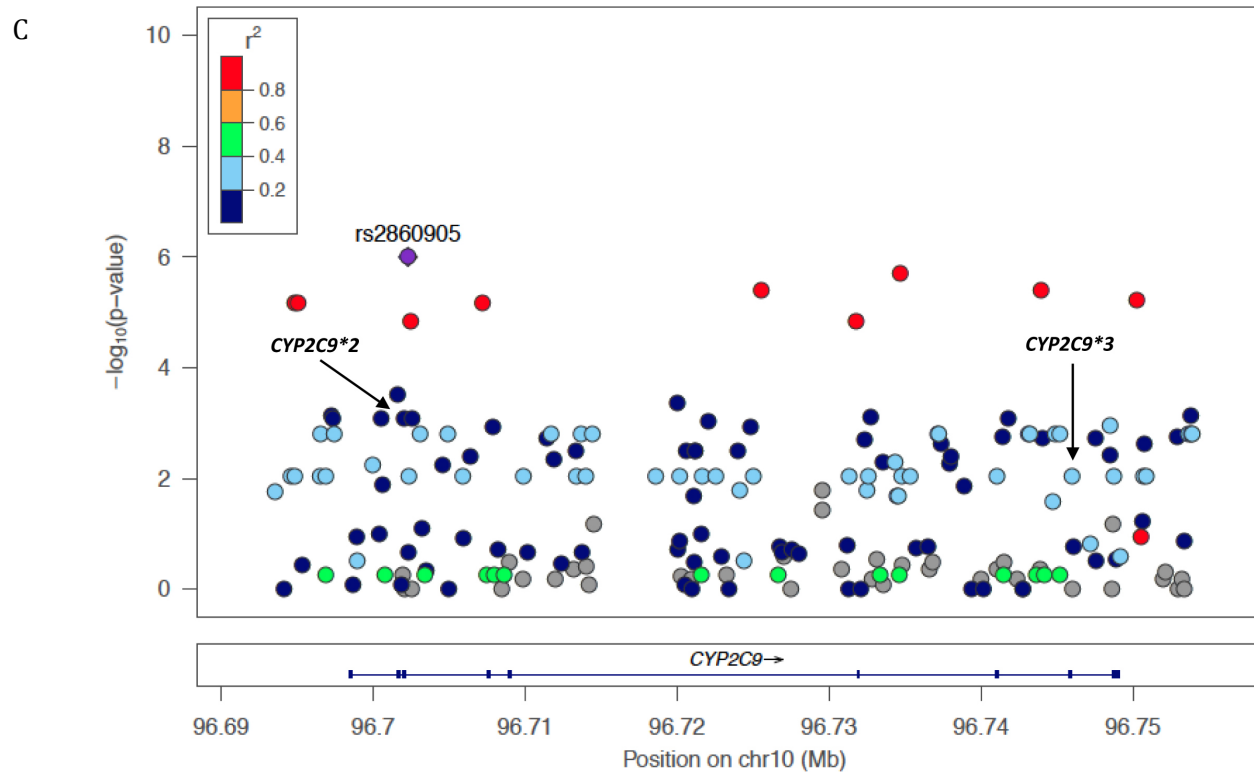

Supplement: DataSheet1.pdf [file DataSheet1.pdf]
